# Supplementary material for: A pedigree-based prediction model identifies carriers of deleterious de novo mutations in families with Li-Fraumeni syndrome
Source: bioRxiv preprint, doi:10.1101/2020.02.10.942409, version 3 (2020-06-06)
Supplement: Supplementary Table 5 [file 942409_file09.docx]

**Supplementary Table 5.** Contingency table of DNM status (*de novo* or familial) and sex in the combined validation and discovery set. (**A**) Contingency table includes 397 cancer patients (people with cancer information, i.e., healthy people excluded). (**B**) Contingency table includes 233 people who are probands with cancer information.

(A)

|  | **Female** | **Male** |
| --- | --- | --- |
| *de novo* | 61 | 19 |
| familial | 204 | 113 |
| odds ratio | 1.78, 95% CI [1.01, 3.13] | |
| p-value | 0.059 | |

(B)

|  | **female** | **male** |
| --- | --- | --- |
| *de novo* | 59 | 19 |
| familial | 115 | 40 |
| odds ratio | 1.08, 95% CI [0.58, 2.03] | |
| p-value | 0.936 | |
