# Supplementary material for: A pedigree-based prediction model identifies carriers of deleterious de novo mutations in families with Li-Fraumeni syndrome
Source: bioRxiv preprint, doi:10.1101/2020.02.10.942409, version 3 (2020-06-06)
Supplement: Supplementary Table 7 [file 942409_file11.docx]

**Supplementary Table 7**. Description of the classic LFS and Chompret (2015) criteria.

| **Criteria** | **Description** |
| --- | --- |
| Classic | - Proband: sarcoma age < 45   AND   - First degree relative: any cancer age < 45   AND   - Other first or second degree relative: any cancer age < 45 or a sarcoma at any age |
| Chompret | - Proband diagnosed with - LFS spectrum cancer age < 46 and - Firstor second degree relative with LFS spectrum cancer (except breast cancer, if the proband has breast cancer) age < 56 or with multiple tumors   OR   - Proband diagnosed with - Multiple primary cancer (except multiple breast cancer), two of which belong to LFS tumor spectrum and the first cancer < 46 year or - Adrenocortical carcinoma, choroid plexus cancer, or rhabdomyosarcoma of embryonal anaplastic subtype, irrespective of family history - Breast cancer before age 31 |
